# Supplementary material for: A comparative analysis of Y chromosome and mtDNA phylogenies of the Hylobates gibbons
Source: PubMed Central journal article supplement (PMC3444420; doi:10.1186/1471-2148-12-150), 2012-08-21

Figure S1 Phylogeny trees of individual Y chromosomal amplicons:

Maximum likelihood (ML) and Bayesian (BI) majority-rule trees of gibbon phylogenies based on the sequences from different Y chromosomal amplicons: DAZ-1, DAZ-2, DBY, RPS4Y, SMCY, TSPY and UTY. The ML trees are on the left and Bayesian trees on the right.

ML and BI trees of DAZ-1

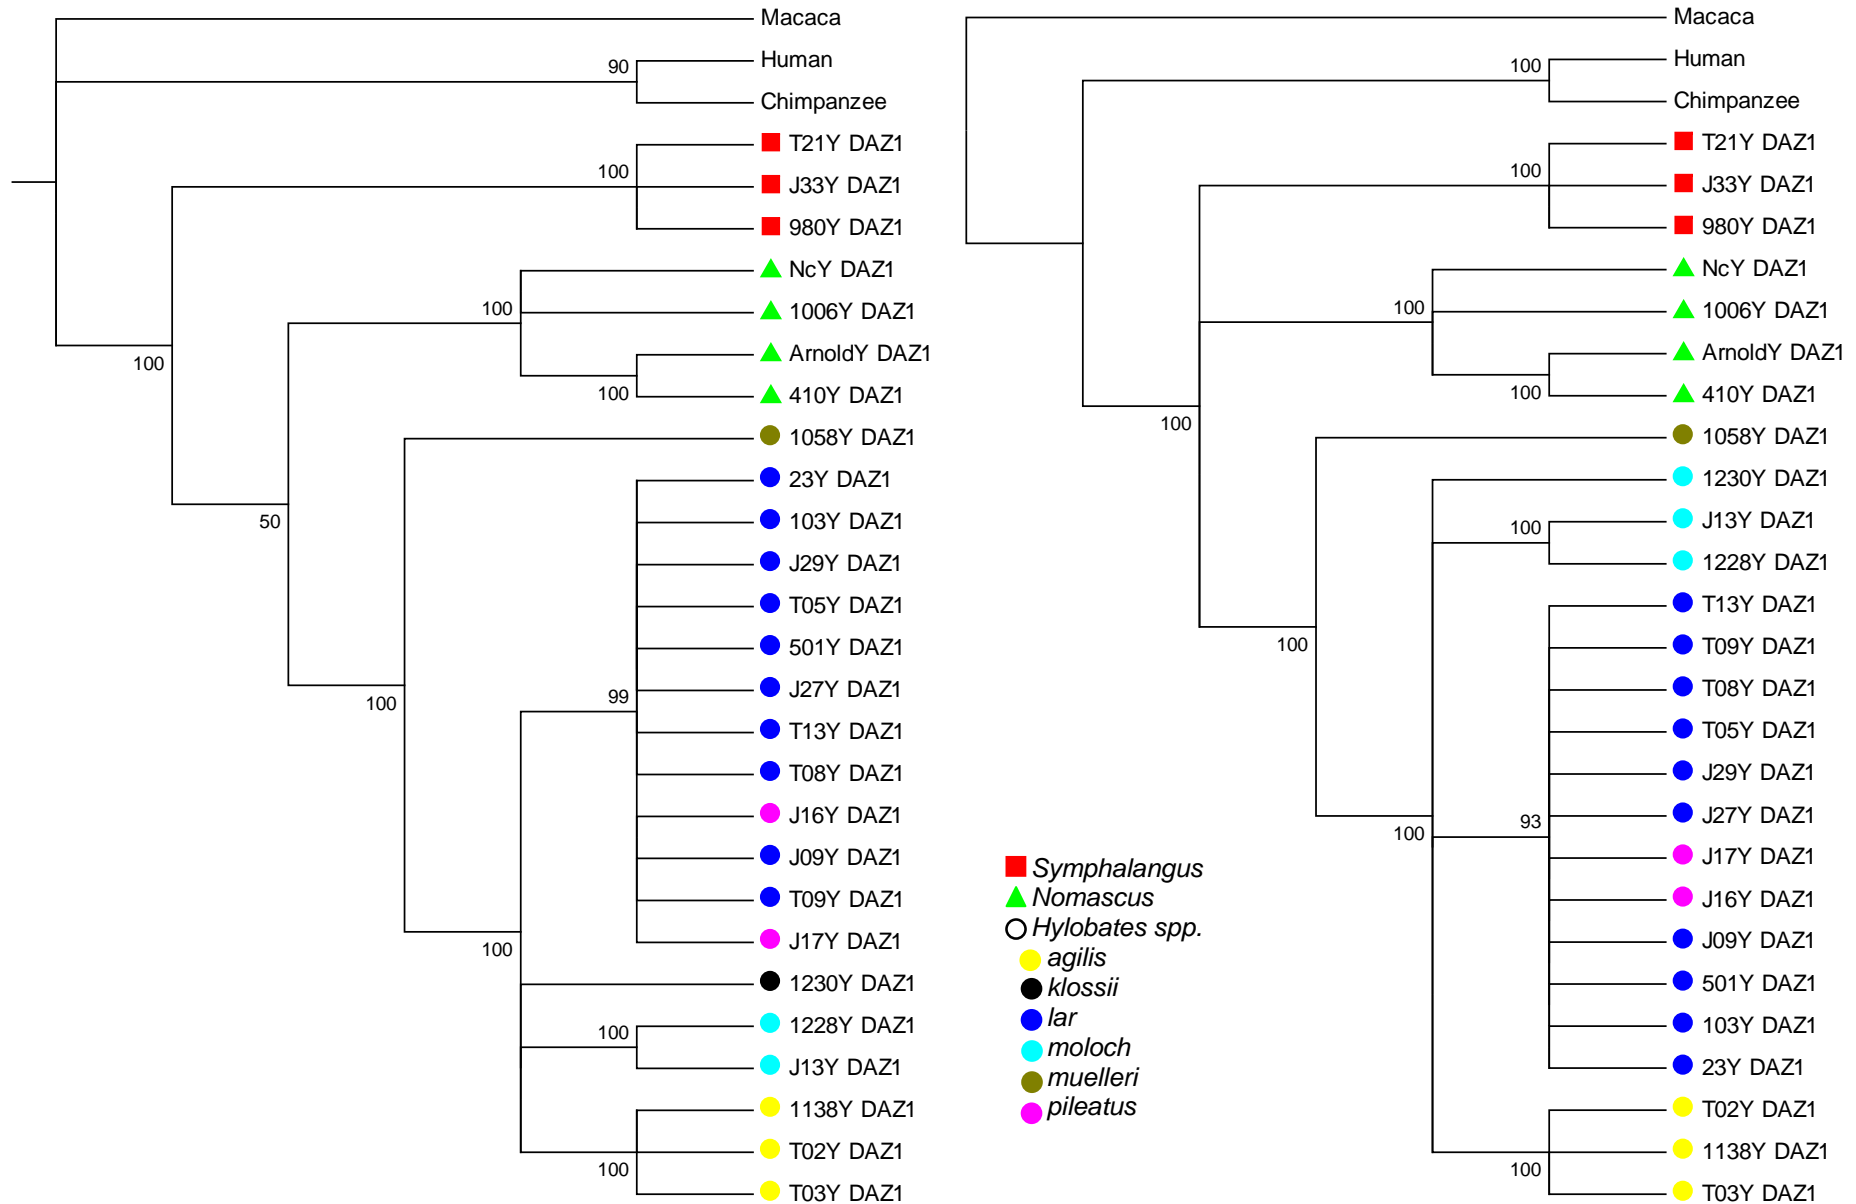

# ML and BI trees of DAZ-2

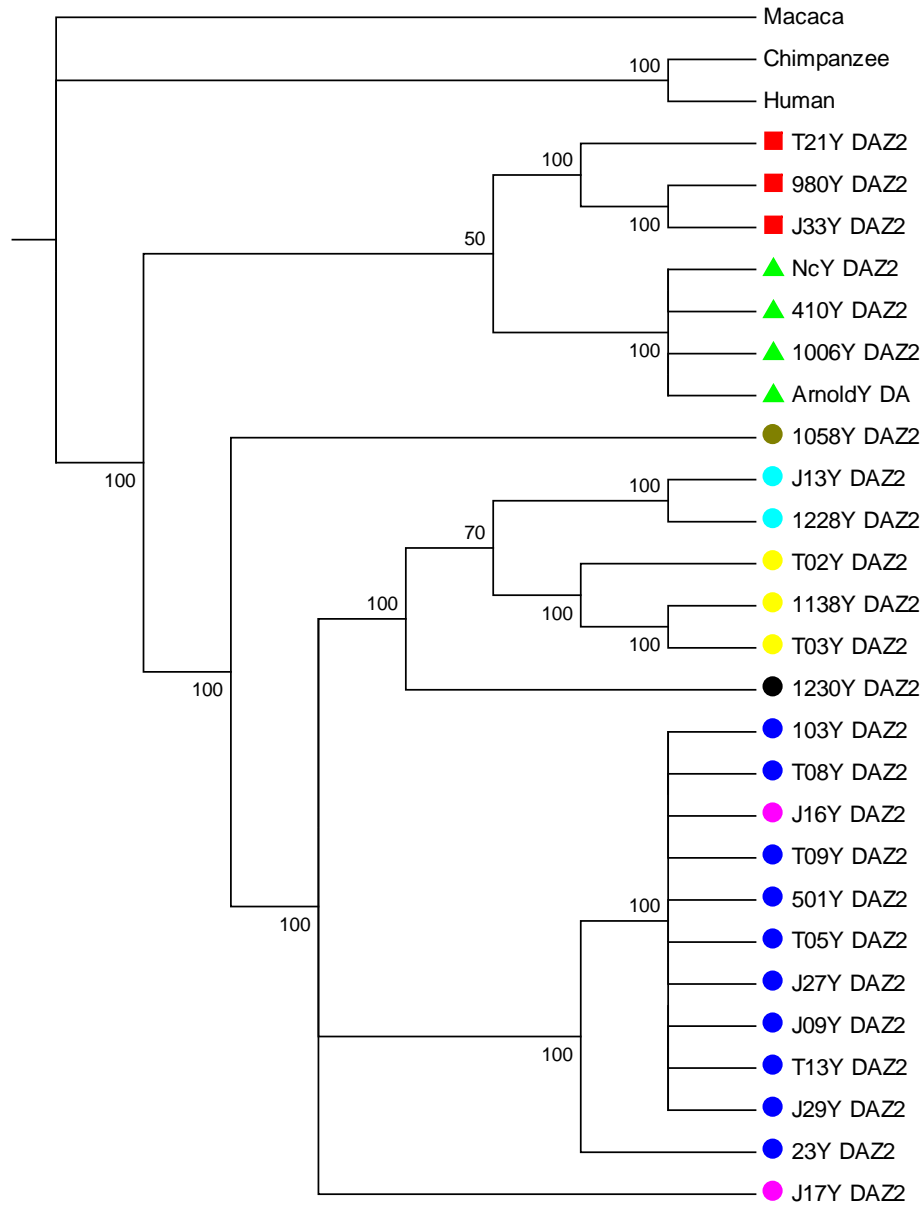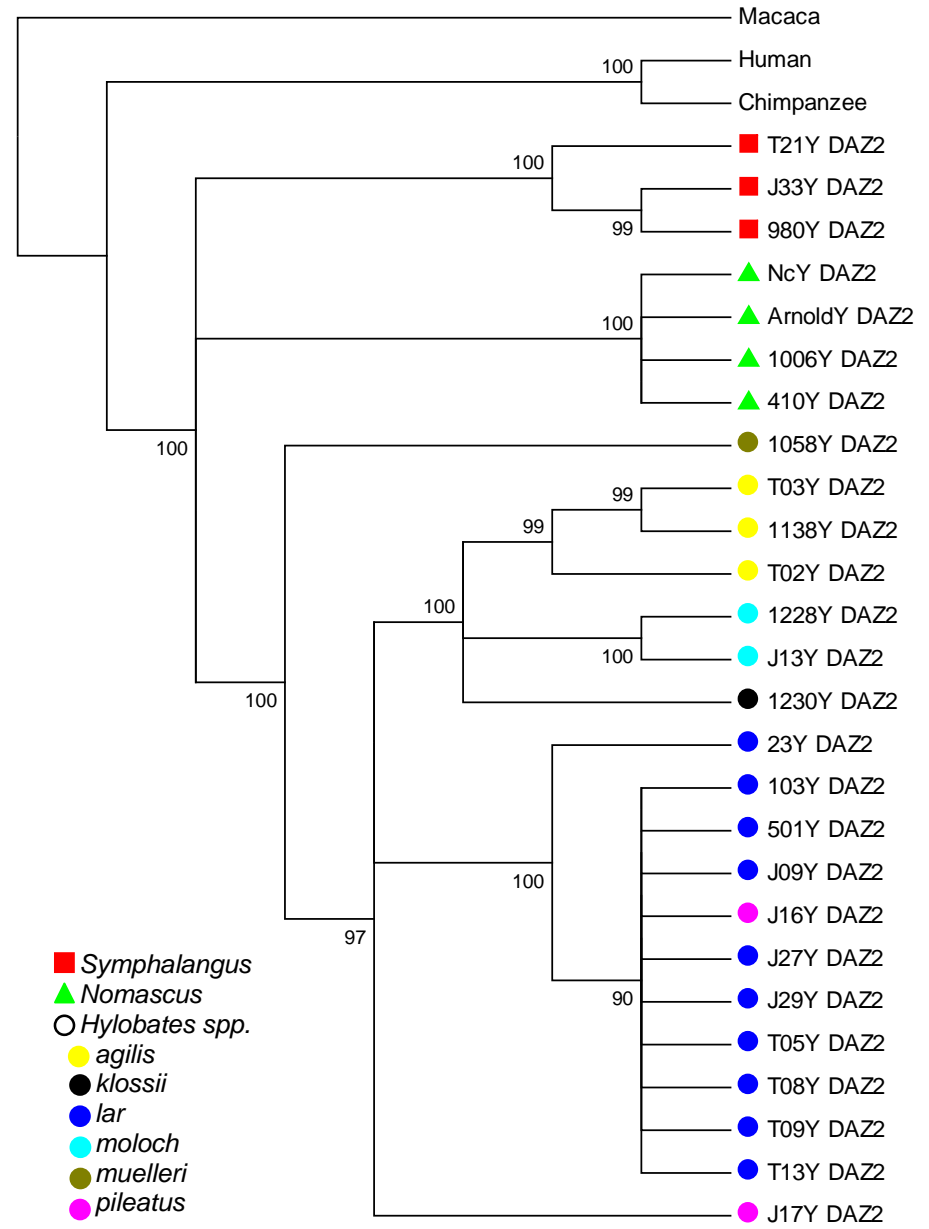

- *Symphalangus*
- ▲ *Nomascus*
- *Hylobates* spp.
- *agilis*
- *klossii*
- *lar*
- *moloch*
- *muelleri*
- *pileatus*

# ML and BI trees of DBY

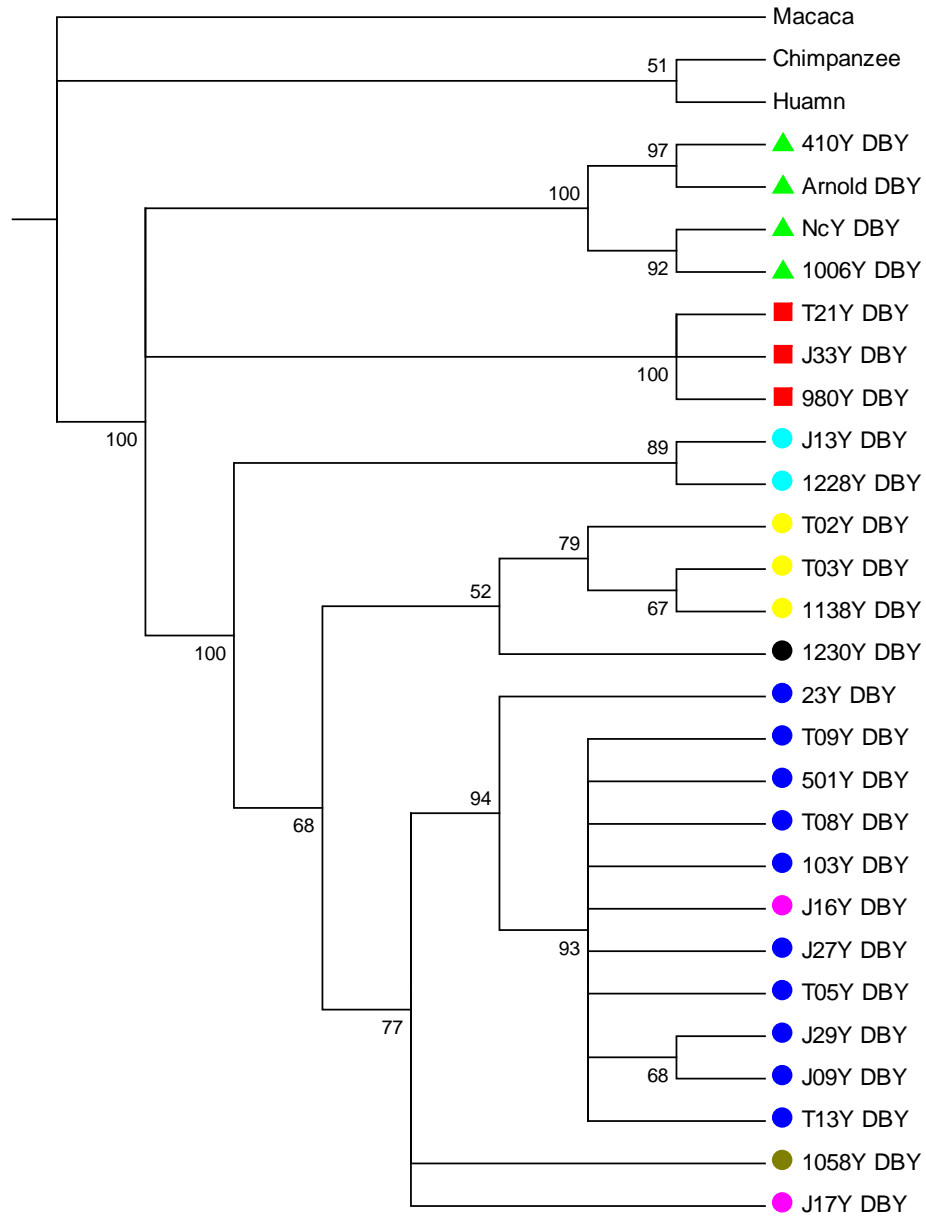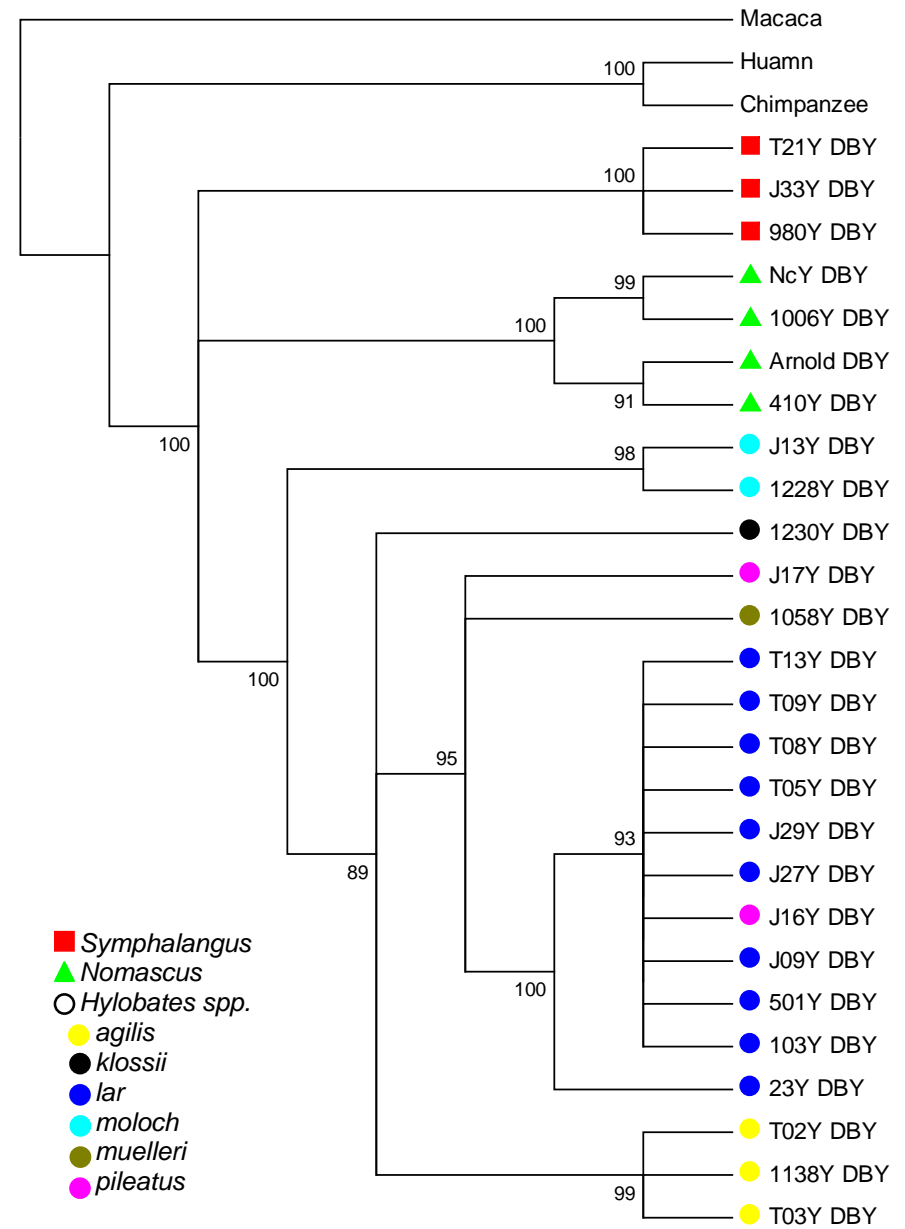

- *Symphalangus*
- ▲ *Nomascus*
- *Hylobates* spp.
- *agilis*
- *klossii*
- *lar*
- *moloch*
- *muelleri*
- *pileatus*

# ML and BI trees of RPS4Y

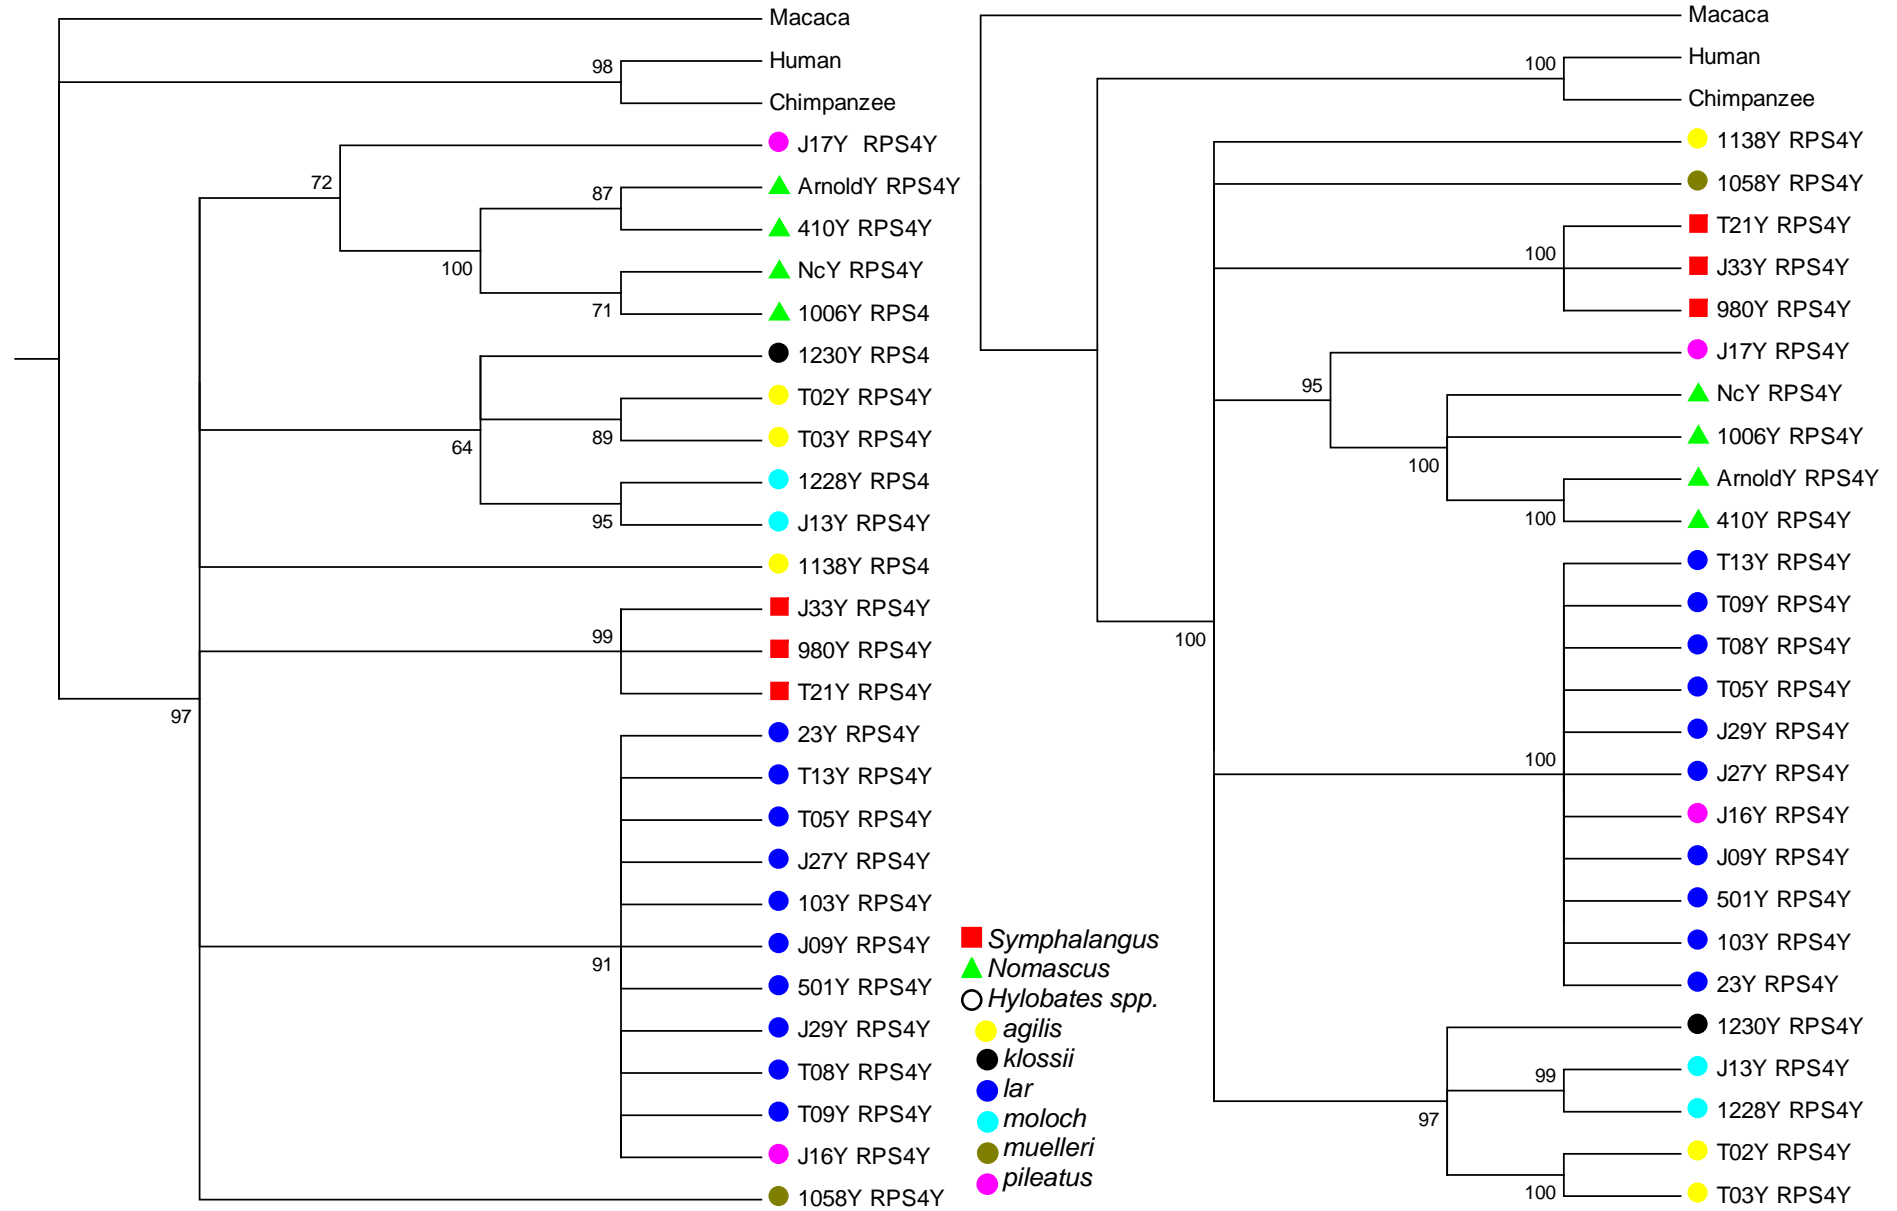

# ML and BI trees of SMCY

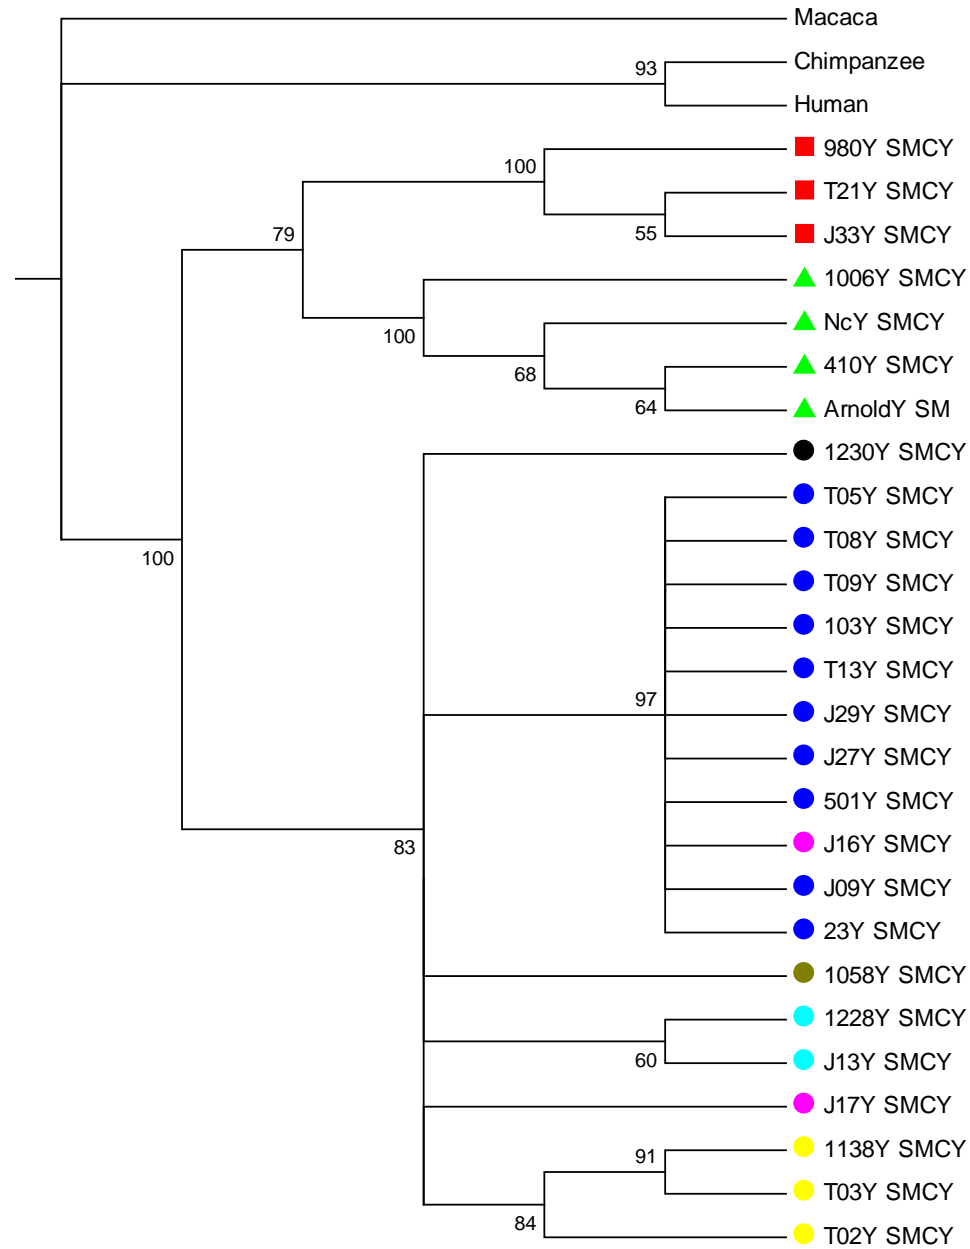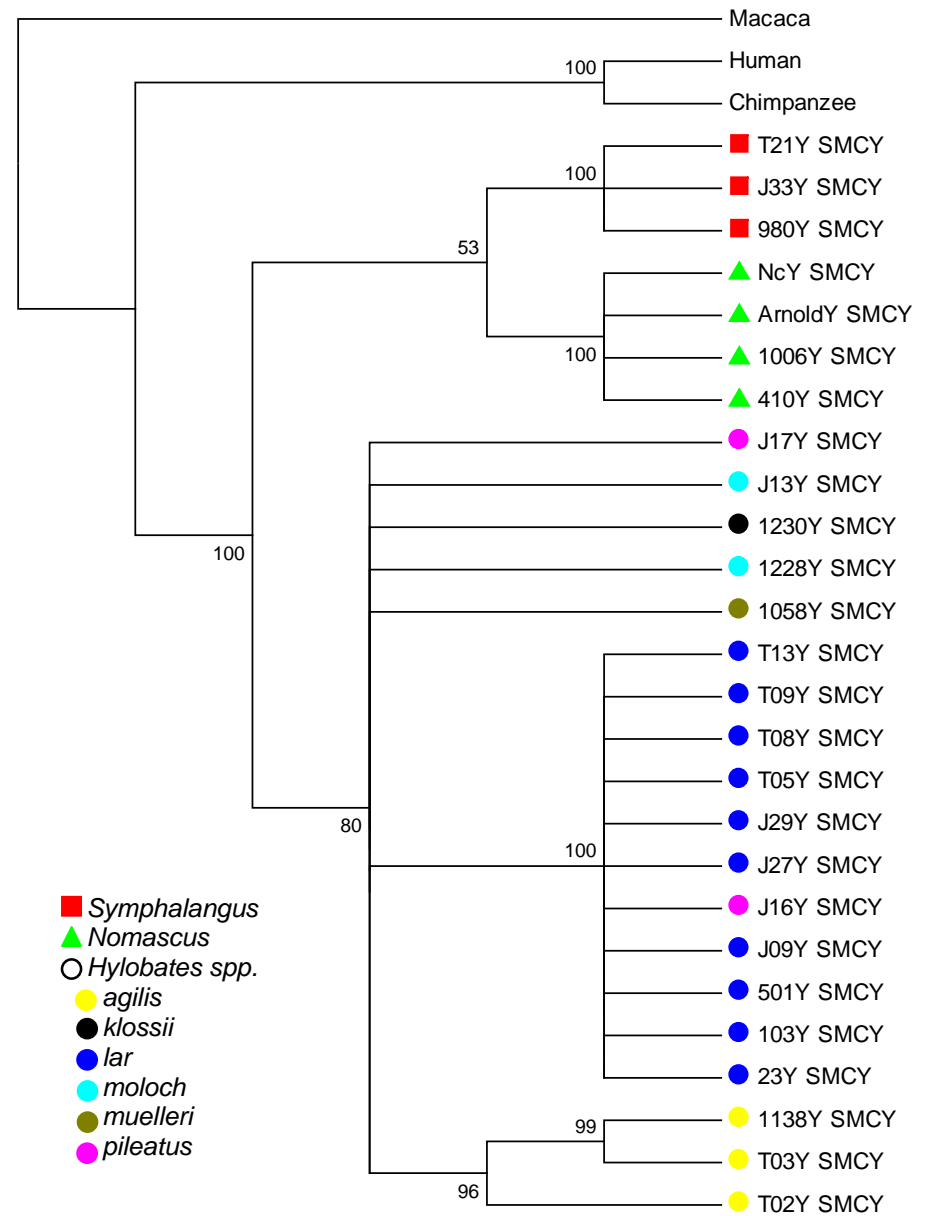

- *Symphalangus*
- ▲ *Nomascus*
- *Hylobates* spp.
- *agilis*
- *klossii*
- *lar*
- *moloch*
- *muelleri*
- *pileatus*

# ML and BI trees of TSPY

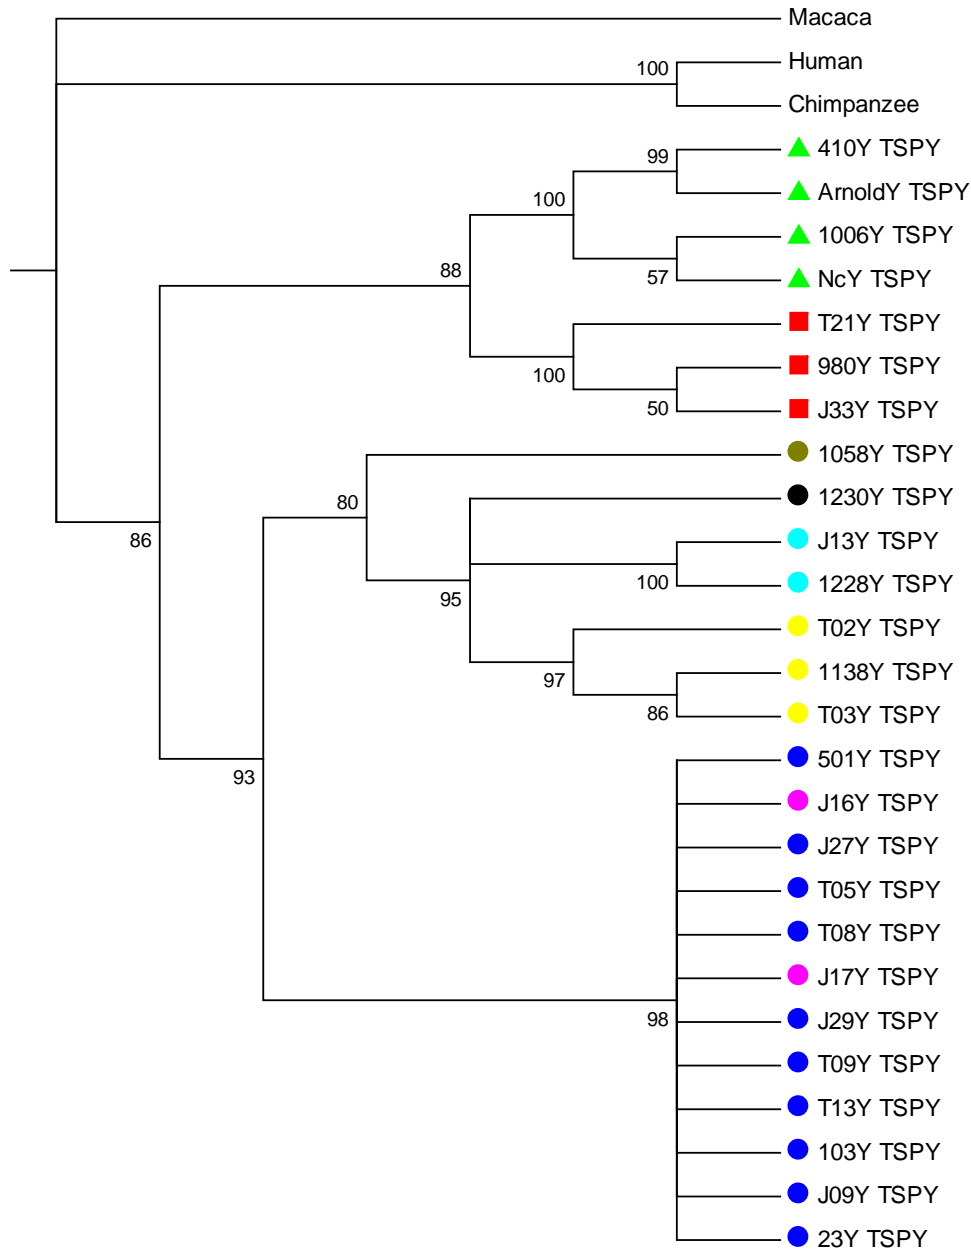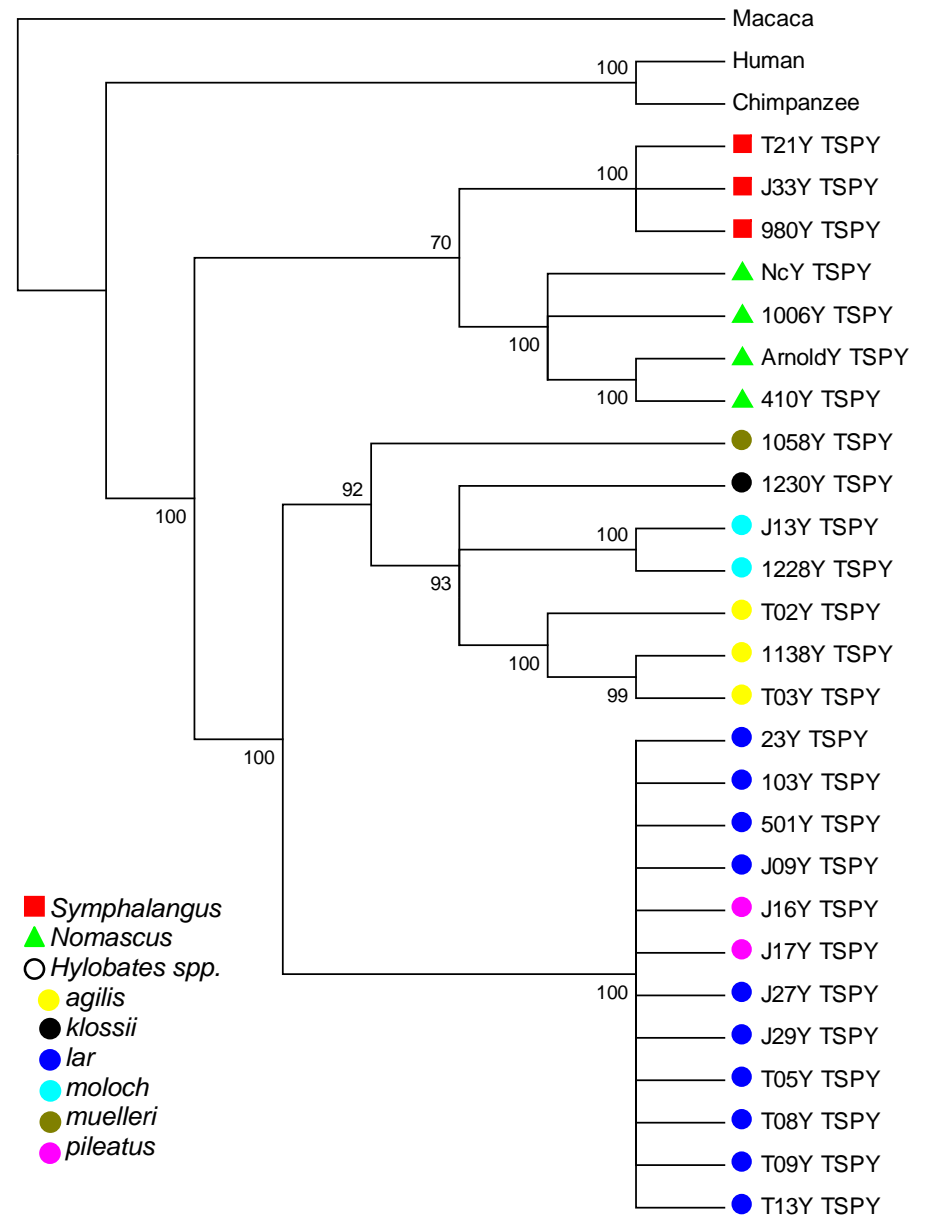

- *Symphalangus*
- ▲ *Nomascus*
- *Hylobates* spp.
- *agilis*
- *klossii*
- *lar*
- *moloch*
- *muelleri*
- *pileatus*

# ML and BI trees of UTY

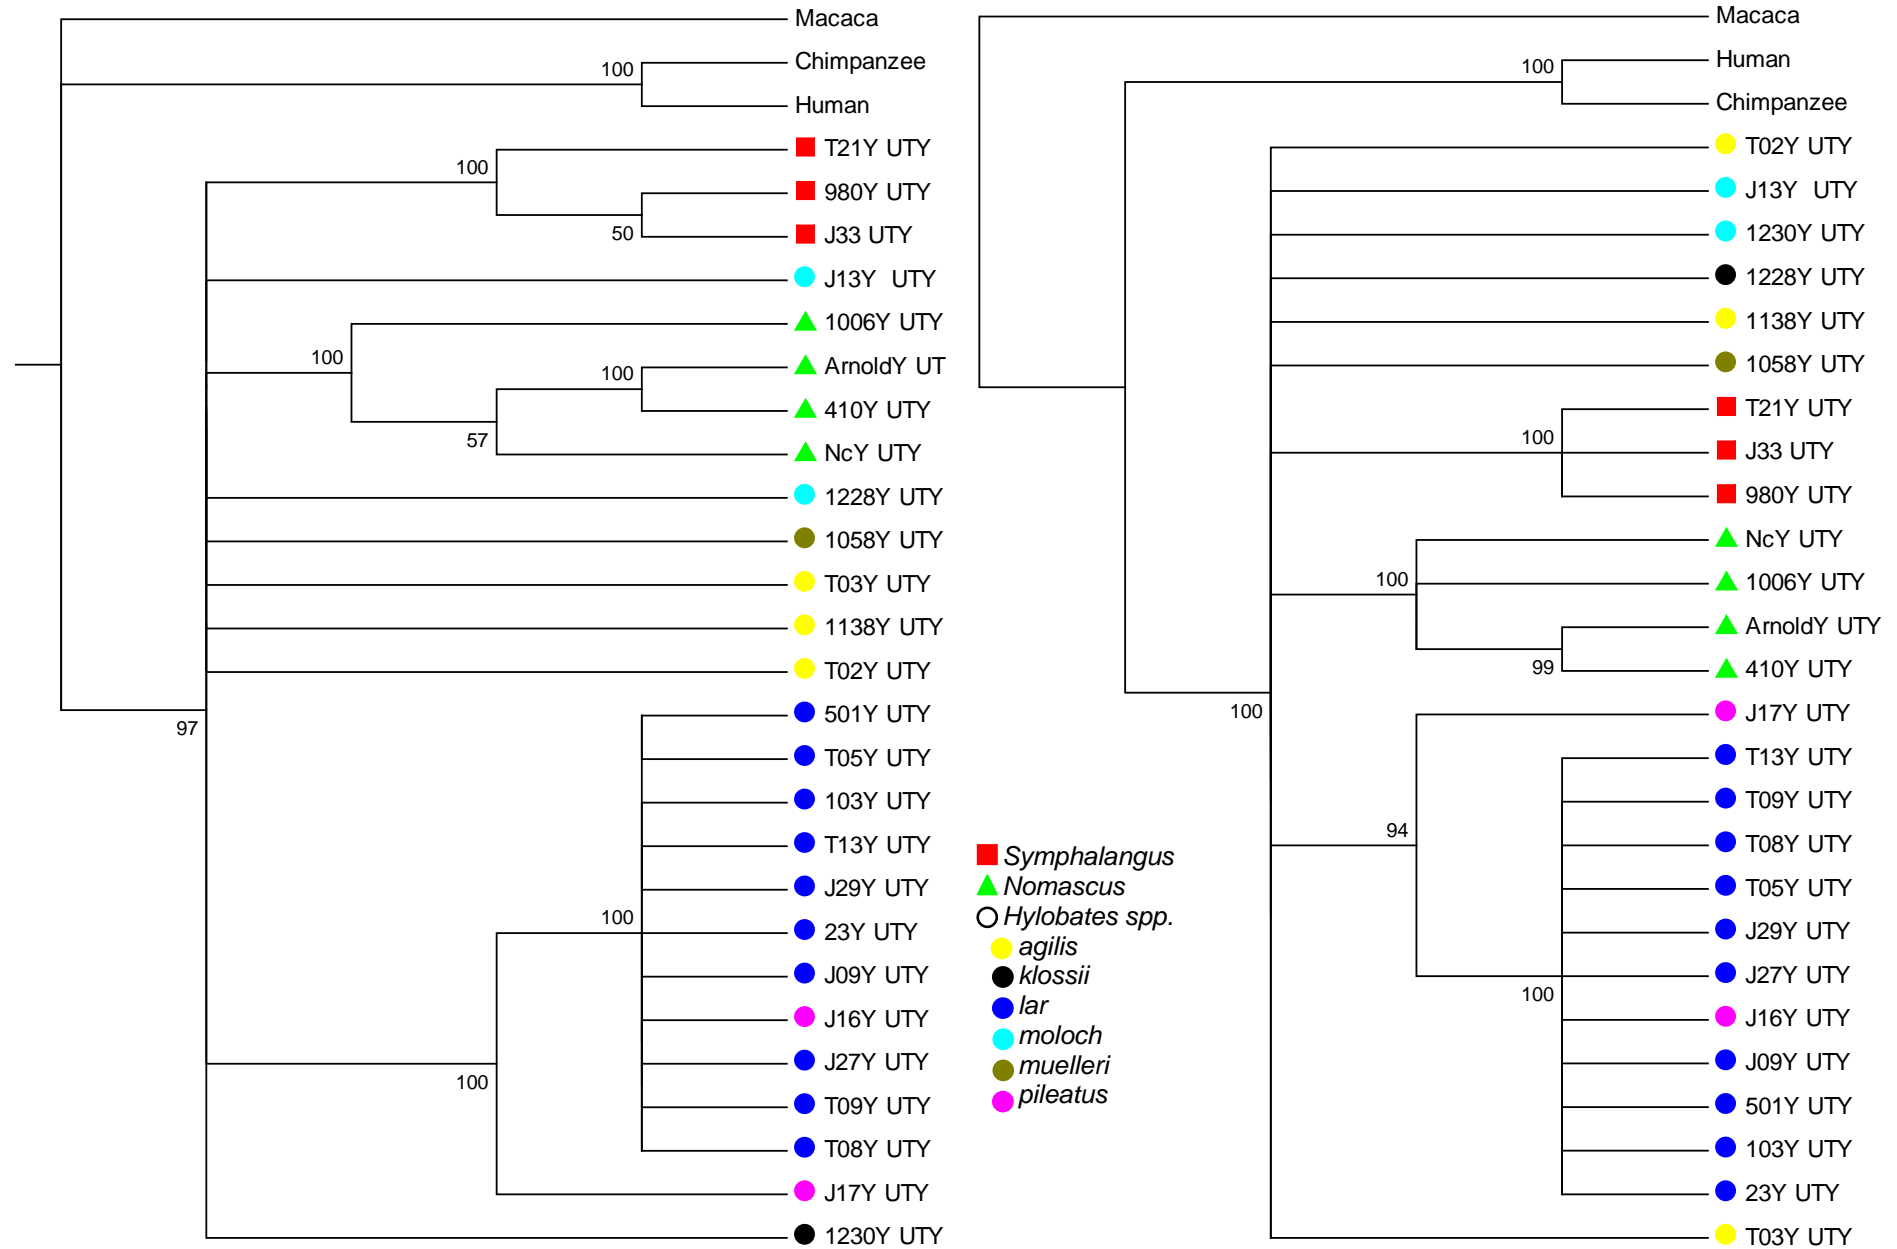

Supplement: 1471-2148-12-150-S1.pdf [file 1471-2148-12-150-S1.pdf]
