# Supplementary material for: A comparative analysis of Y chromosome and mtDNA phylogenies of the Hylobates gibbons
Source: PubMed Central journal article supplement (PMC3444420; doi:10.1186/1471-2148-12-150), 2012-08-21
Supplement: 1471-2148-12-150-S2.pdf [file 1471-2148-12-150-S2.pdf]

## Supplementary Materials

Table S1. Gibbon samples used in the present study

| Genus               | Species            | owner's ID/Barcode ID | Working ID <sup>b</sup> | Origin <sup>a</sup>        | Current deposition <sup>a</sup> |                       |
|---------------------|--------------------|-----------------------|-------------------------|----------------------------|---------------------------------|-----------------------|
| <i>Hylobates</i>    | <i>agilis</i>      | 20050293D10           | <u>T02</u>              | Taipei Zoo                 | Taipei Zoo                      |                       |
|                     |                    | 20060466D10           | T03                     | Taipei Zoo                 | Taipei Zoo                      |                       |
|                     |                    | 1138                  | 1138                    | Bristol Zoo                | German Primate Center           |                       |
|                     | <i>lar</i>         | 20040083D10           | <u>T05</u>              | Taipei Zoo                 | Taipei Zoo                      |                       |
|                     |                    | 20040111D10           | T08                     | Taipei Zoo                 | Taipei Zoo                      |                       |
|                     |                    | 20040112D10           | <u>T09</u>              | Taipei Zoo                 | Taipei Zoo                      |                       |
|                     |                    | 20040286D10           | <u>T13</u>              | Taipei Zoo                 | Taipei Zoo                      |                       |
|                     |                    | 23                    | 23                      | Wuppertal Zoo              | German Primate Center           |                       |
|                     |                    | 103                   | 103                     | Nuremberg Zoo              | German Primate Center           |                       |
|                     |                    | 501                   | <u>501</u>              | Nuremberg Zoo              | German Primate Center           |                       |
|                     |                    | 2356                  | <u>J09</u>              | Dusit Zoo                  | WRC, Kyoto University           |                       |
|                     |                    | 1982                  | <u>J27</u>              | Chiang Mai Zoo             | WRC, Kyoto University           |                       |
|                     |                    | 3400                  | <u>J29</u>              | PRI, Kyoto University      | WRC, Kyoto University           |                       |
|                     |                    | <i>muelleri</i>       | 1058                    | <u>1058</u>                | Rostock Zoo                     | German Primate Center |
|                     |                    | <i>klossii</i>        | 1230                    | <u>1230</u>                | Twycross Zoo                    | German Primate Center |
|                     |                    | <i>moloch</i>         | 2488                    | <u>J13</u>                 | Ragunan Zoo                     | WRC, Kyoto University |
|                     |                    |                       | 1228                    | 1228                       | Twycross Zoo                    | German Primate Center |
| <i>pileatus</i>     | 2360               | <u>J16</u>            | Dusit Zoo               | WRC, Kyoto University      |                                 |                       |
|                     | 2361               | <u>J17</u>            | Dusit Zoo               | WRC, Kyoto University      |                                 |                       |
| <i>Symphalangus</i> | <i>syndactylus</i> | 20060592D10           | <u>T21</u>              | Taipei Zoo                 | Taipei Zoo                      |                       |
|                     |                    | 980                   | <u>980</u>              | Krefeld Zoo                | German Primate Center           |                       |
|                     |                    | 1973                  | <u>J33</u>              | Padang, Sumatra, Indonesia | WRC, Kyoto University           |                       |
| <i>Nomascus</i>     | <i>leucogenys</i>  | 1006                  | <u>1006</u>             | Duisburg Zoo               | German Primate Center           |                       |
|                     | <i>gabriellae</i>  | Arnold                | <u>Arnold</u>           | Leipzig Zoo                | MPI-EVA                         |                       |
|                     |                    | Falco                 | <u>Falco</u>            | Leipzig Zoo                | MPI-EVA                         |                       |
|                     | <i>concolor</i>    | 1231                  | <u>Nc</u>               | Twycross Zoo               | German Primate Center           |                       |

<sup>a</sup> Abbreviations: PRI, Primate Research Institute; WRC, Wildlife Research Center; MPI-EVA, Max-Planck Institute for Evolutionary Anthropology

<sup>b</sup> The mtgenome sequences of the individuals underlined are retrieved for the reconstruction of mtgenome phylogeny, in which individuals T02, T05 and T09 are the sons of individuals T01, T05 and T10, respectively, as shown in Figure 2.

Table S2. List of primers tested in this study for the amplification of the non-recombining portion of Y chromosome

| NCBI name     | Gene name* | primer pair         | Reference                       | Note                                 |
|---------------|------------|---------------------|---------------------------------|--------------------------------------|
| <i>DAZI</i>   | DAZ        | 1990FY x 3760RYsiam | Makova and Li, 2002 [1]         | Applied to all male individuals      |
|               |            | 6996FY x 8754RY     | Makova and Li, 2002 [1]         | Failed to amplify in every species   |
|               |            | 18219FY x 19599RY   | Makova and Li, 2002 [1]         | Applied to all male individuals      |
|               |            | 18264F x 21252RY    | Makova and Li, 2002 [1]         | Amplification occurred in both sexes |
|               |            | 2384FY x 4809RY     | Makova and Li, 2002 [1]         | Failed to amplify in every species   |
|               |            | 25321FY x 27521RY   | Makova and Li, 2002 [1]         | Failed to amplify in every species   |
| <i>DDX3Y</i>  | DBY        | DBY1-F x DBY1-R     | Hellborg and Ellegren, 2003 [2] | Failed to amplify in every species   |
|               |            | DBY5-F x DBY5-R     | Hellborg and Ellegren, 2003 [2] | Applied to all male individuals      |
|               |            | DBY6-F x DBY6-R     | Hellborg and Ellegren, 2003 [2] | Failed to amplify in every species   |
| <i>EIF1AY</i> | EIF1AY     | EI-1 x EI-2         | Hong et al., 2007 [3]           | Failed to amplify in every species   |
| <i>RPS4Y1</i> | RPS4Y      | RPS4Y4-F x RPS4Y4-R | Hellborg and Ellegren, 2003 [2] | Applied to all male individuals      |
|               |            | RPS4Y-F x RPS4Y-R   | Samollow et al., 1996 [4]       | Failed to amplify in every species   |
| <i>KDM5D</i>  | SMCY       | SMCY7-F x SMCY7-R   | Hellborg and Ellegren, 2003 [2] | Applied to all male individuals      |
|               |            | SMCY11-F x SMCY11-R | Hellborg and Ellegren, 2003 [2] | Failed to amplify in every species   |
| <i>TSPY</i>   | TSPY       | TSPY-A x TSPY-B     | Kim et al., 1996 [5]            | Applied to all male individuals      |
| <i>UTY</i>    | UTY        | UTY11-F x UTY11-R   | Hellborg and Ellegren, 2003 [2] | Applied to all male individuals      |

\*Gene name aliases used in the references and this study.

**Table S3. Primer sequences, sources of primers, and PCR conditions used in this study**

| Locus | Primer name            | Primer sequence (5'-3')          | PCR condition                                                                                                                                              | Estimated size (bp) | PCR Master Mix* |
|-------|------------------------|----------------------------------|------------------------------------------------------------------------------------------------------------------------------------------------------------|---------------------|-----------------|
| DAZ   | 1990FY<br>(DAZ-1F)     | F: TGGGGAAACATAAGGGAGAAAAAAGTA   | 92°C 2 min, (92°C 10 sec, 57°C 15 sec, 68°C 4 min) × 9 cycles, (92°C 10 sec, 57°C 15 sec, 68°C 4 min) × 21 cycles with 20 sec extension/cycle, 68°C 7 min  | 1350                | A               |
|       | 3760RYsiam<br>(DAZ-1R) | R: GGCTTGGCACGGAAAGACG           |                                                                                                                                                            |                     |                 |
| DAZ   | 18219FY<br>(DAZ-2F)    | F: GCTTAATCCAAACAATCAGTGAGACA    | 92°C 2 min, (92°C 10 sec, 57°C 15 sec, 68°C 4 min) × 9 cycles, (92°C 10 sec, 57°C 15 sec, 68°C 4 min) × 21 cycles with 20 sec extension/ cycle, 68°C 7 min | 1600                | A               |
|       | 19599RY<br>(DAZ-2R)    | R: GCCTTAAC TT TAAGAGAATATTGGGGA |                                                                                                                                                            |                     |                 |
| DBY   | DBY5-F                 | F: CTTTGAGAAATATGATGATATA        | 95°C 10 min, touchdown with an annealing temperature of 55°-45°C over 20 cycles, (95°C 1 min, 45°C 1 min, 72°C 1 min 30 sec) × 30 cycles, 72°C 10 min      | 750                 | B               |
|       | DBY5-R                 | R: CGAGTAAGTTCAATGTTC            |                                                                                                                                                            |                     |                 |
| RPS4Y | RPS4Y4-F               | F: GAACAGATTCTCTTCCGTCG          | 95°C 10 min, touchdown with an annealing temperature of 63°-53°C over 20 cycles, (95°C 1 min, 53°C 1 min, 72°C 1 min 30 sec) × 30 cycles, 72°C 10 min      | 600                 | B               |
|       | RPS4Y4-R               | R: GCTGCAACACGCTTTAAGTG          |                                                                                                                                                            |                     |                 |
| SMCY  | SMCY7-F                | F: TGGAGGTGCCCRAARTGTA           | 95°C 10 min, touchdown with an annealing temperature of 63°-53°C over 20 cycles, (95°C 1 min, 53°C 1 min, 72°C 1 min 30 sec) × 30 cycles, 72°C 10 min      | 500                 | B               |
|       | SMCY7-R                | R: AACTCTGCAA STR TACTCCT        |                                                                                                                                                            |                     |                 |
| TSPY  | TSPY-A                 | F: AGCCAGGAAGGCCTTTTCTCG         | 94°C 4 min, (94°C 1 min, 60°C 1 min, 72°C 1 min 30 sec) × 30 cycles, 72°C 7 min                                                                            | 780                 | B               |
|       | TSPY-B                 | R: CCATGTAGCTCAGCATGTCTTCAT      |                                                                                                                                                            |                     |                 |
| UTY   | UTY11-F                | F: CATCAATTTTGTAYMAATCCAAAA      | 95°C 10 min, touchdown with an annealing temperature of 63°-53°C over 20 cycles, (95°C 1 min, 53°C 1 min, 72°C 1 min 30 sec) × 30 cycles, 72°C 10 min      | 900                 | B               |
|       | UTY11-R                | R: TGGTAGAGAAAAGTCCAAGA          |                                                                                                                                                            |                     |                 |

\*The final concentration of each reagent in a PCR Master Mix of 50 ul reaction volume. A, a PCR Master Mix consists of 100 ng of the purified WGA products, 0.3 μM of each forward and reverse primer, 500 μM of each dNTP, and 3.5 units of the Expand Long Range Enzyme mix (Roche) with 1X Expand Long Range Buffer containing MgCl<sub>2</sub>. B, a PCR Master Mix consists of 100 ng of the purified WGA products, 2.2 mM MgCl<sub>2</sub>, 0.2 μM of each forward and reverse primer, 200 μM of each dNTP, and 2 units of AmpliTaq Gold DNA polymerase (Applied Biosystems, Roche) with 1X AmpliTaq Gold PCR buffer II.

Table S4. GenBank IDs for outgroup sequences and newly obtained sequences of gibbons in this study

| Amplicons | <i>Homo sapiens</i>     | <i>Pan troglodytes</i>        | <i>Macaca mulatta</i>    | Gibbons           |
|-----------|-------------------------|-------------------------------|--------------------------|-------------------|
| DAZ-1     | AF483577                | AC147143 (62937-64614)        | AC217138 (113167-114796) | JN871346-JN871371 |
| DAZ-2     | AF483578                | AC147143 (51140-52443)        | AC217138 (98953-100288)  | JN871320-JN871345 |
| DBY       | NG_012831 (13912-14646) | NC_006492 (18025162-18025912) | AC213321 (74334-75043)   | JN871424-JN871449 |
| RPS4Y     | AF041427 (19681-20250)  | NC_006492 (23753790-23754359) | AC217136 (84539-85106)   | JN871398-JN871423 |
| SMCY      | AF273841 (45121-45592)  | AF440161                      | AC215644 (72205-71739)   | JN871476-JN871501 |
| TSPY      | M98524 (1158-1895)      | Kim and Takenaka 1996*        | AF425276                 | JN871372-JN871397 |
| UTY       | AF265575                | NC_006492 (18457945-18458832) | AC212004 (1240-2129)     | JN871450-JN871475 |

The numbers in parenthesis next to the GenBank accession numbers indicate the regions used as outgroup sequences in the phylogenetic analyses. \* The TSPY sequence of *Pan troglodytes* is shown in Kim and Takenaka (1996) [6].

## References

1. Makova KD, Li W-H: **Strong male-driven evolution of DNA sequences in humans and apes.** *Nature* 2002, **416**:624-626.
2. Hellborg L, Ellegren H: **Y chromosome conserved anchored tagged sequences (YCATS) for the analysis of mammalian male-specific DNA.** *Mol Ecol* 2003, **12**:283-291.
3. Hong KW, Huh JW, Kim DS, Ha HS, Kim HS: **Molecular relationship of hylobates based on Alu elements of the Y chromosome.** *Korean J Genet* 2007, **29**:379-387.
4. Samollow PB, Cherry LM, Witte SM, Rogers J: **Interspecific variation at the Y-linked RPS4Y locus in hominoids: implications for phylogeny.** *Am J Phys Anthropol* 1996, **101**:333-343.
5. Kim HS, Hirai H, Takenaka O: **Molecular features of the TSPY gene of gibbons and Old World monkeys.** *Chromosome Res* 1996, **4**:500-506.
6. Kim HS, Takenaka O: **A comparison of TSPY genes from Y-chromosomal DNA of the great apes and humans: sequence, evolution, and phylogeny.** *Am J Phys Anthropol* 1996, **100**:301-309.
